# Supplementary material for: LptD is a promising vaccine antigen and potential immunotherapeutic target for protection against Vibrio species infection
Source: Sci Rep. 2016 Dec 6;6:38577. doi: 10.1038/srep38577 (PMC5138612; doi:10.1038/srep38577)
Supplement: Supplementary Information [file srep38577-s1.pdf]

## **Supporting information**

### **LptD is a promising vaccine antigen and immunotherapeutic target for protection against *Vibrio* species infection**

Zhenzhong Zha<sup>1,2#</sup>, Chuchu Li<sup>1,2#</sup>, Weiyan Li<sup>1,2</sup>, Zhicang Ye<sup>1,2</sup> and Jianyi Pan<sup>1,2\*</sup>

<sup>1</sup> School of Life Sciences, Zhejiang Sci-Tech University, Hangzhou 310018, China

<sup>2</sup> Zhejiang Provincial Key Laboratory of Silkworm Bioreactor and Biomedicine, Hangzhou 310018, China

#### **\*Corresponding author:**

Dr. Jianyi Pan, School of Life Sciences, Zhejiang Sci-Tech University, Hangzhou 310018, China; Zhejiang Provincial Key Laboratory of Silkworm Bioreactor and Biomedicine, Hangzhou 310018, China., Tel: +86 571 86843747, Fax: +86 571 8684 3745, E-mail: [jianyi.pan@zstu.edu.cn](mailto:jianyi.pan@zstu.edu.cn)

# These authors contribute equally to this work.

## Legends of Supplementary Figures

**Fig. S1** Three dimensional structures showed linear antibody epitopes of (a) YLNSDKKYQDDS (286-297)(score of 0.77), (b) IPDETTNYS (585-593)(score of 0.648), and (c) LENLDT (656-661)( score of 0.507); epitope residues were in yellow. Epitopes were predicted by ElliPro based on the modelled three dimensional structure of LptD.

**Fig. S2** Chart review of discontinuous B cell epitopes predicted by DiscoTope (<http://tools.immuneepitope.org/stools/discotope/discotope.do>) which was based on predicted three dimensional structure of LptD. Prediction threshold was set at -1.

**Fig. S3** Homology alignment of top 5 score of CTL epitopes of *V. parahaemolyticus* LptD among different *Vibrio* species. The CTL epitopes were predicted by CTLPred server based on SVM methods. Identical residues were in red and strongly similar residues were in green. The epitopes were listed with score from high to low. Peptides boxed with dotted line were distributed inside of cell outer membrane.

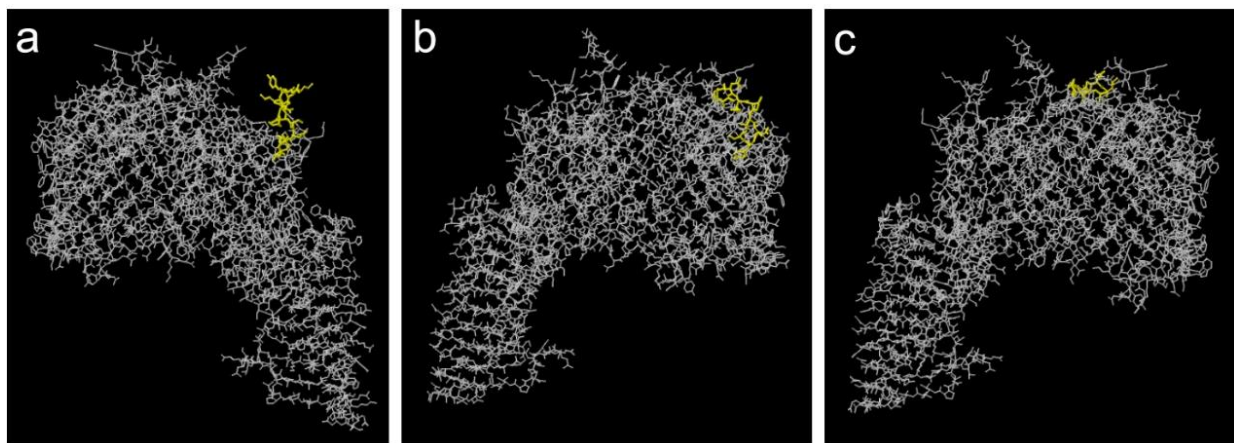

**Fig. S1**

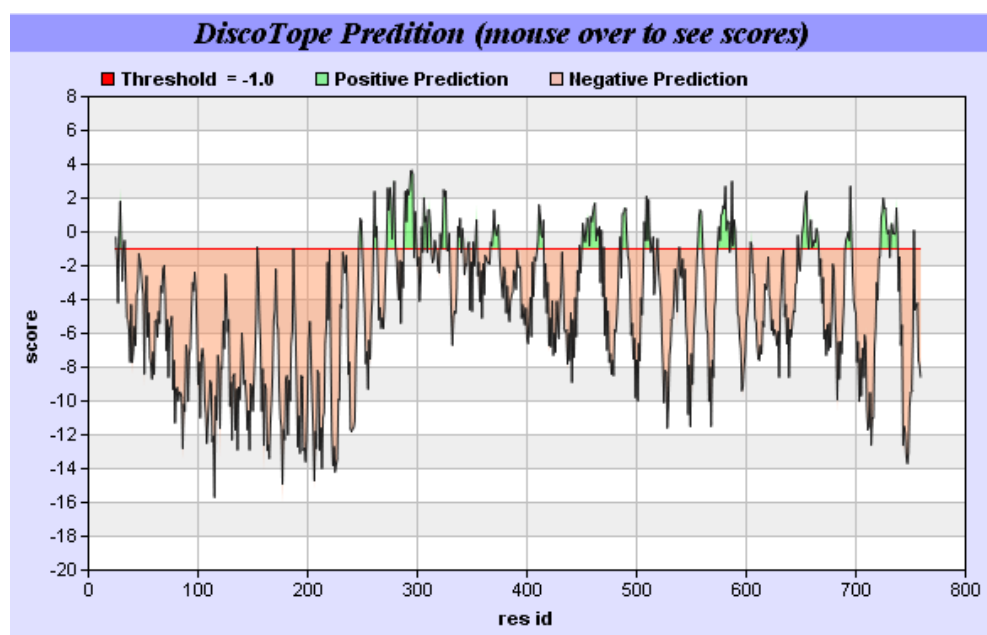

**Fig. S2**

|                            | 783           | 197           | 374           | 100           | 659           |
|----------------------------|---------------|---------------|---------------|---------------|---------------|
| <i>V. parahaemolyticus</i> | <br>IKYGRPFYL | <br>IMDVPVFYV | <br>KEENRPYRL | <br>TLHQQDNVV | <br>EYIEDTIIL |
| <i>V. alginolyticus</i>    | IKYGRPFYL     | VLDVPVFYV     | KEENRPYRL     | TLHQQDNVV     | EYIEDTIIL     |
| <i>V. harveyi</i>          | IKYGRPFYL     | VLDVPVFYV     | QEDNQPYRL     | TLHQQDNVV     | EYIEDTIIV     |
| <i>V. campbellii</i>       | IKYGRPFYL     | ILDVPVFYV     | EEDNQPYRL     | VTLHQQDNV     | EYIEDTIIV     |
| <i>V. natriegens</i>       | IKYGRPFYL     | VLDVPIFYV     | QEENKPYRL     | TLHQQDNVV     | EYIEDTIIL     |

Fig. S3
